# Supplementary material
Source: PubMed Central journal article supplement (PMC6535571)
Supplement: AAC.00133-19-s0001.pdf [file AAC.00133-19-s0001.pdf]

## Supplementary Materials

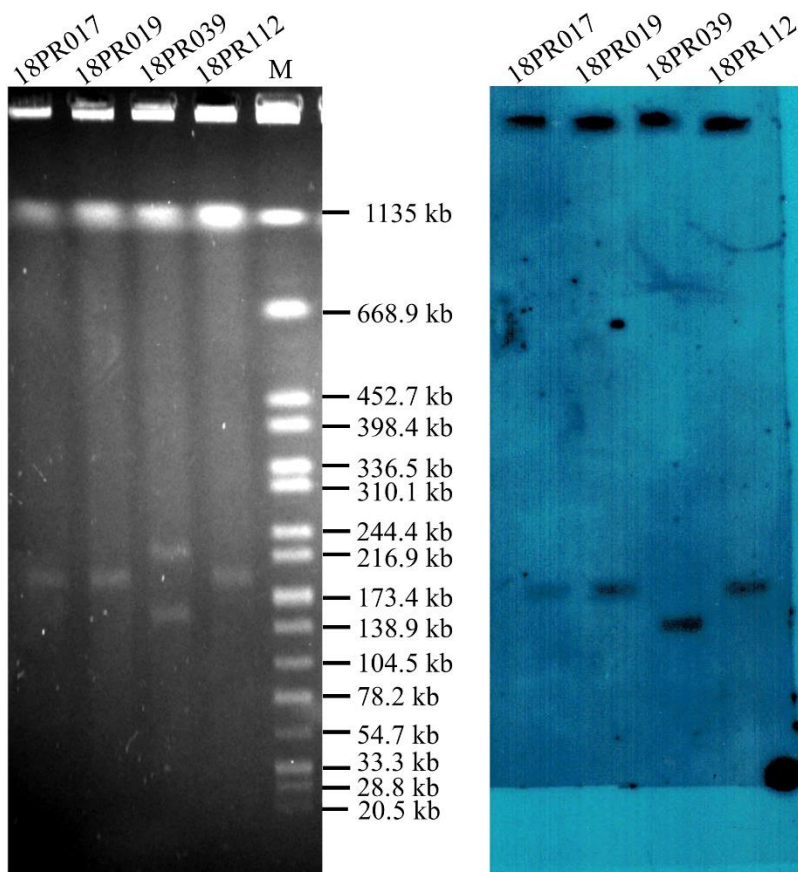

**Fig. S1** Location of *mcr-4.3* in *Shewanella* spp. The left image represents the S1-PFGE map of four *mcr-4.3*-carrying *Shewanella* strains; the right image is the result of Southern blotting hybridization using *mcr-4.3* probe. M: *Salmonella* H9812 (New England BioLabs, Beverly, MA).

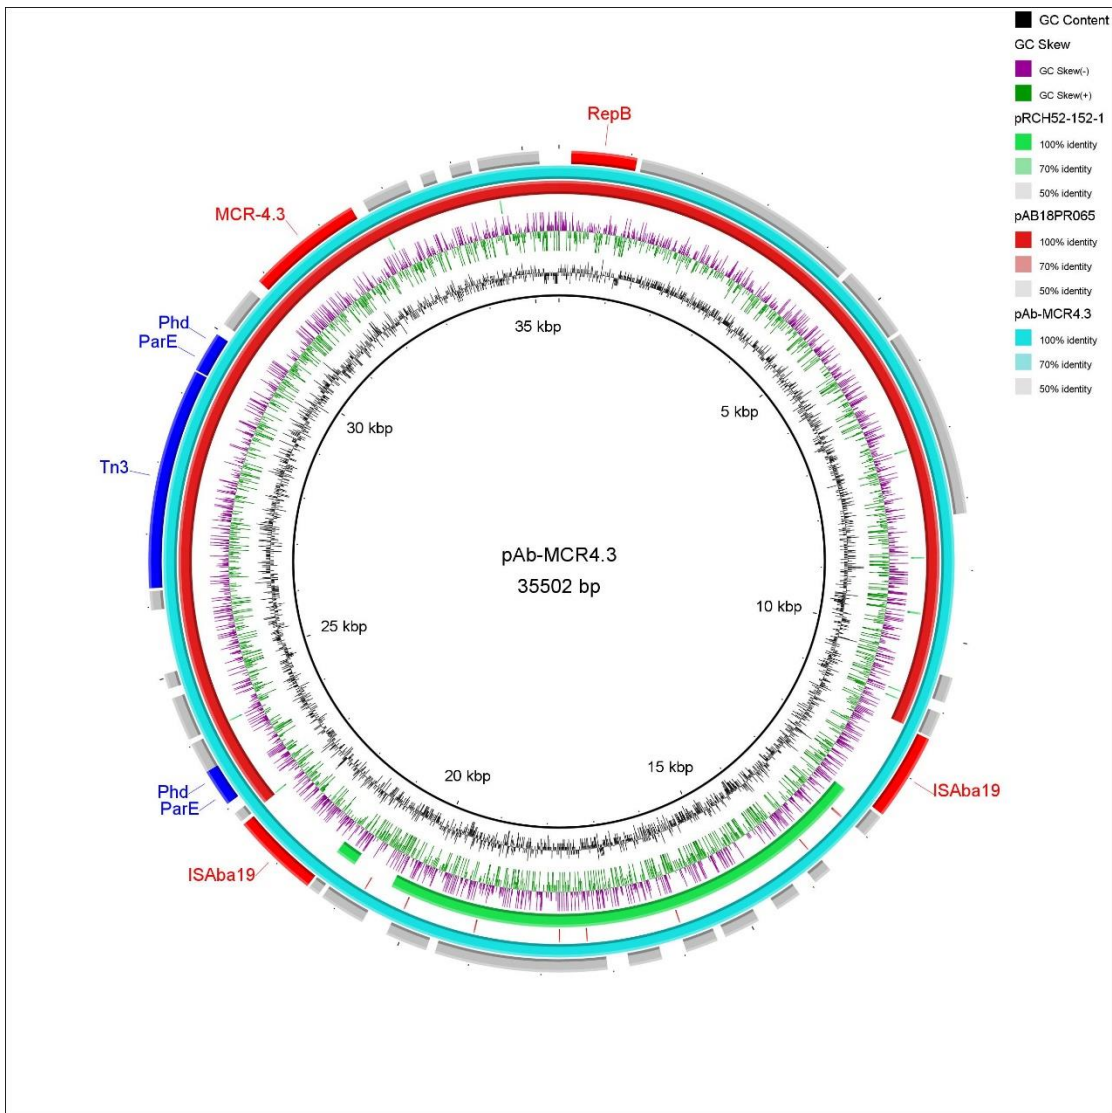

**Fig. S2** Circular genetic map of pAB18PR065, pRCH52-1 and pAb-MCR4.3. pAB18PR065 (accession no. MK360916), pRCH52-1 (accession no. KT346360), pAb-MCR4.3 (accession no. NZ\_CP033872). The map was drawn using BLAST Ring Image Generator (BRIG) (<http://sourceforge.net/projects/brig/>).

Tree scale: 0.1

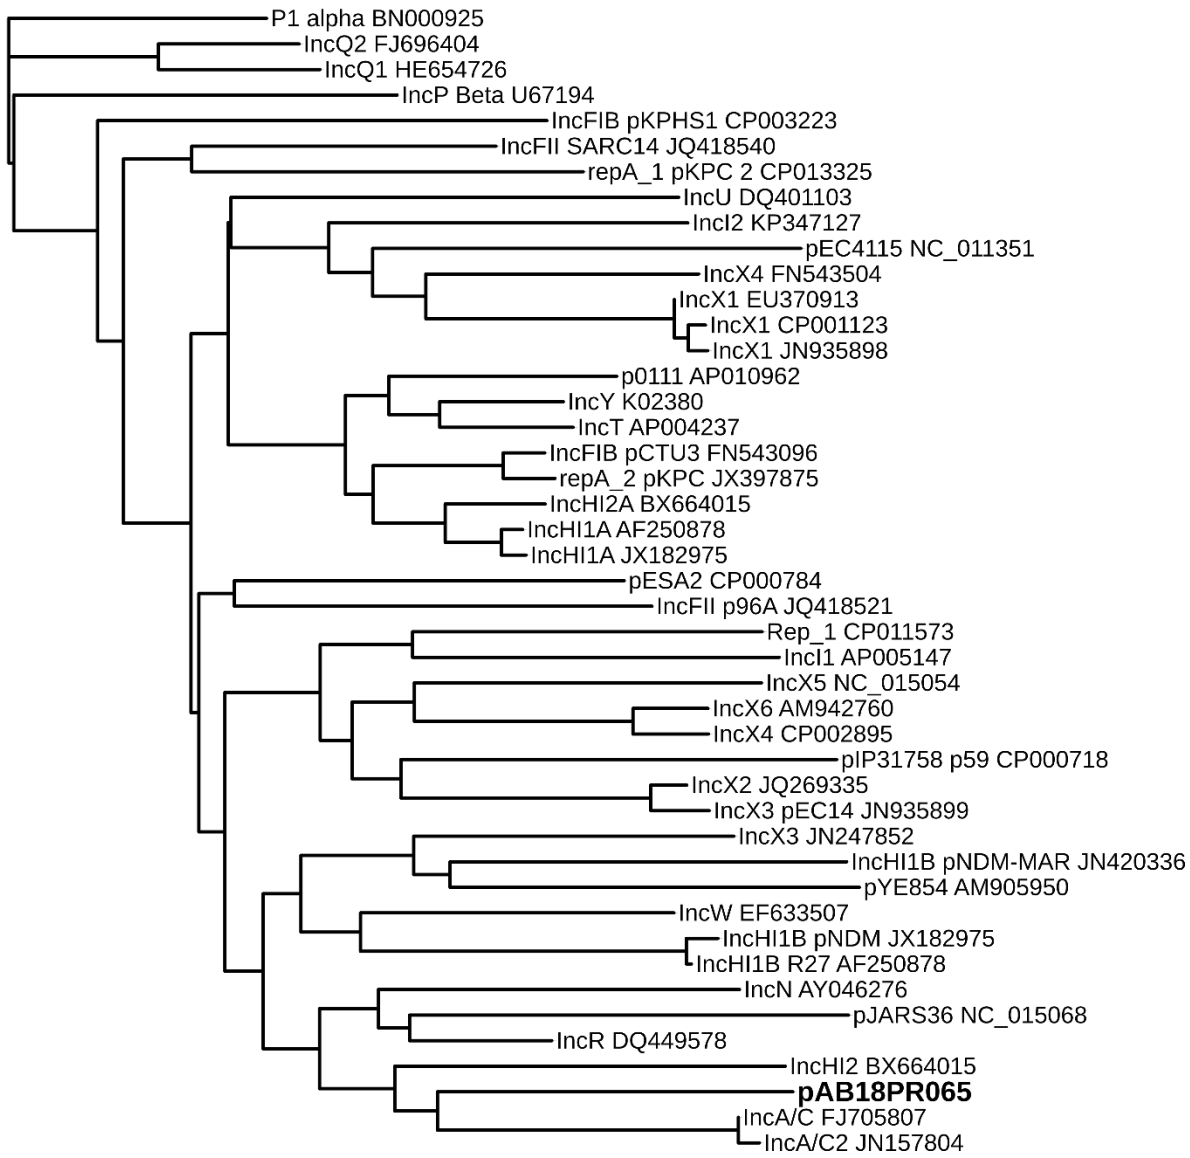

**Fig. S3** Phylogenetic analysis of the replicon sequences across various plasmids.

**Table S1** Distribution of *mcr*-harboring isolates from different sources

| Source             | Total | Species                | Number of<br><i>mcr</i> -harboring<br>isolates | <i>mcr</i> gene |              |              |              |              |                               |
|--------------------|-------|------------------------|------------------------------------------------|-----------------|--------------|--------------|--------------|--------------|-------------------------------|
|                    |       |                        |                                                | <i>mcr-1</i>    | <i>mcr-2</i> | <i>mcr-3</i> | <i>mcr-4</i> | <i>mcr-5</i> | <i>mcr-1</i> and <i>mcr-3</i> |
| Pig                | 185   | <i>E. coli</i>         | 58                                             | 54              | -            | 1            | -            | -            | 3                             |
|                    |       | <i>Shewanella</i> spp. | 4                                              | -               | -            | -            | 4            | -            | -                             |
|                    |       | <i>A. baumannii</i>    | 1                                              | -               | -            | -            | 1            | -            | -                             |
| Healthy individual | 320   | <i>E. coli</i>         | 11                                             | 11              | -            | -            | -            | -            | -                             |
|                    |       | <i>Shewanella</i> spp. | -                                              | -               | -            | -            | -            | -            | -                             |
|                    |       | <i>A. baumannii</i>    | -                                              | -               | -            | -            | -            | -            | -                             |
| Patient            | 170   | <i>E. coli</i>         | 10                                             | 10              | -            | -            | -            | -            | -                             |
|                    |       | <i>Shewanella</i> spp. | -                                              | -               | -            | -            | -            | -            | -                             |
|                    |       | <i>A. baumannii</i>    | -                                              | -               | -            | -            | -            | -            | -                             |

**Table S2** Antibacterial drugs susceptibility profiles of *A. baumannii* AB18PR065

| Strain    | MIC ( $\mu$ g/mL) |     |     |     |     |     |     |     |          |     |     |      |      |     |       |  |
|-----------|-------------------|-----|-----|-----|-----|-----|-----|-----|----------|-----|-----|------|------|-----|-------|--|
|           | CST               | PMB | TGC | AMP | AMC | CTX | CAZ | FEP | GEN      | AMK | ETP | IPM  | MEM  | FOF | CIP   |  |
| AB18PR065 | 8                 | 8   | 1   | 16  | 64  | 8   | 4   | 2   | $\leq 1$ | 8   | 2   | 0.25 | 0.25 | 64  | 0.125 |  |

Abbreviations: CST, colistin; PMB, polymyxin B; TGC, tigecycline; AMP, ampicillin; CTX, cefotaxime; CAZ, ceftazidime; FEP, cefepime; GEN, gentamicin; AMK: amikacin; ETP, ertapenem; IPM, imipenem; MEM, meropenem; FOF, fosfomycin; CIP, ciprofloxacin.

**Table S3** Alleles of the seven house-keeping genes of Oxford and Pasteur schemes among *A. baumannii*

| Strain    | ST(Oxf) | <i>cpn60</i> | <i>gdhB</i> | <i>gltA</i> | <i>gpi</i>  | <i>gyrB</i> | <i>recA</i> | <i>rpoD</i> |
|-----------|---------|--------------|-------------|-------------|-------------|-------------|-------------|-------------|
| AB18PR065 | New     | 48           | 49          | 51          | 25          | 90          | 11          | 4           |
| MRSN15313 | 233     | 28           | 8           | 1           | 106         | 15          | 10          | 32          |
| Strain    | ST(Pas) | <i>cpn60</i> | <i>fusA</i> | <i>gltA</i> | <i>pyrG</i> | <i>recA</i> | <i>rplB</i> | <i>rpoB</i> |
| AB18PR065 | 1303    | 3            | 3           | 16          | 1           | 13          | 1           | 15          |
| MRSN15313 | 79      | 26           | 2           | 2           | 2           | 29          | 4           | 5           |

**Table S4** Primers used in this study to close pAB18PR065

| Purpose         | Name | Nucleotide sequence (5'→3') | Amplicon size (bp) | Annealing temperature (°C) |
|-----------------|------|-----------------------------|--------------------|----------------------------|
| Circularization | CF   | TGAGGATCAGCATCAACTAACAC     | 779                | 56                         |
|                 | CR   | TTTTAAGCCCTTCATAGGCTGC      |                    |                            |
| Identification  | IF   | TCTGTCCATGCGAGATGCAG        | 1551               | 54                         |
|                 | IR   | GTAGTTCTGTGTTAGCCGATC       |                    |                            |
